# Supplementary material
Source: HighWire-hosted journal article supplement (https://bmjopen.bmj.com/content/8/1/e016980)
Supplement: inline-supplementary-material-1 [file inline-supplementary-material-1.pdf]

**eAppendix: ICD9 and ICD10 diagnosis codes. The character “x” in code listings represents any character.**

|                                                                | ICD-9-CM                                                                                   | ICD-10-CM                                                                                                                                                                                                                                                                                                                                                                                                                                              |
|----------------------------------------------------------------|--------------------------------------------------------------------------------------------|--------------------------------------------------------------------------------------------------------------------------------------------------------------------------------------------------------------------------------------------------------------------------------------------------------------------------------------------------------------------------------------------------------------------------------------------------------|
| <b>Diagnosis</b>                                               |                                                                                            |                                                                                                                                                                                                                                                                                                                                                                                                                                                        |
| Atrial fibrillation and flutter                                | 427.3x (note: the entire tree of codes)                                                    | I48.x (note: the entire tree of codes)                                                                                                                                                                                                                                                                                                                                                                                                                 |
| Mitral or aortic valvular disease                              | 394, 396                                                                                   | I05, I08.0, I08.1, I08.2, I08.3                                                                                                                                                                                                                                                                                                                                                                                                                        |
| valve surgery & procedures                                     | Procedure codes 35.0x, 35.1x, 35.2x, 35.96, 35.97, 35.99                                   | Procedure codes 02RJ, 02RF, 02RG, 02RH, 02QF, 02QG, 02QH, 02QJ<br><br>CCI Procedure Codes: 1.HT.89, 1.HV.80, 1.HU.80, 1.HT.80, 1.HS.80, 1.HV.90 1.HU.90, 1.HT.90, 1.HS.90                                                                                                                                                                                                                                                                              |
| <b>Co-morbidities</b>                                          |                                                                                            |                                                                                                                                                                                                                                                                                                                                                                                                                                                        |
| Ischemic Heart Disease                                         | 410, 411, 412, 413, 414, 429.2, V45.81, procedure codes 36.xx                              | I20-I25, procedure codes 0210, 0211, 0212, 0213<br><br>CCI Procedure codes: 1.IJ.76, 1.IJ.50, 1.IJ.57                                                                                                                                                                                                                                                                                                                                                  |
| MI                                                             | 410, 412                                                                                   | I21, I22, I25.2                                                                                                                                                                                                                                                                                                                                                                                                                                        |
| Angina                                                         | 411.1, 413                                                                                 | I20                                                                                                                                                                                                                                                                                                                                                                                                                                                    |
| Peripheral vascular diseases (PAD, aneurysm, dissection, etc.) | 440, 441, 442, 443, 447.1, 557.1, 557.9, procedure codes 39.22, 39.25, 39.26, 39.29, 39.50 | I70, I71, I72, I73, I77.1, I79.0, K55.1, K55.8, K55.9, Z95.82x, Z95.9, procedure codes 031, 03Q, 041, 04Q<br><br>CCI Procedure Codes: 1.KE.76, 1.KA.76, 1.ID.76, 1.IB.76, 1.IA.76, 1.ID.76, 1.IC.76, 1.JM.76, 1.JJ.76, 1.KT.76, 1.KR.76, 1.KE.76, 1.KG.76, 1.JM.76, 1.JK.76, 1.JX.76, 1.JY.76, 1.KA.50, 1.IB.50, 1.IA.50, 1.ID.50, 1.IC.50, 1.KE.50, 1.JJ.50, 1.JL.50, 1.KG.50, 1.KA.57, 1.IB.57, 1.ID.57, 1.IC.57, 1.KE.57, 1.KT.57, 1.KG.57, 1.JM.57 |
| PAD                                                            | 440, 443.9                                                                                 | I70, I73.9                                                                                                                                                                                                                                                                                                                                                                                                                                             |
| Cerebrovascular disease                                        | 430-438, 362.3, procedure codes 38.12, 39.74                                               | I60-64, I65-69, G45, G46, H34.x (x = 0, 1, 8, 9), procedure codes 031y, where y is any of [G, S, T, H, J, K, M, L, N], and                                                                                                                                                                                                                                                                                                                             |

|                               |                                         |                                                                                                                                                                                   |
|-------------------------------|-----------------------------------------|-----------------------------------------------------------------------------------------------------------------------------------------------------------------------------------|
|                               |                                         | 03Qy, where y is any of [G, H, J, K, L, M, N, P, Q, R, S, T]<br><br>CCI Procedure Codes: 1.ID.76, 1.JE.76, 1.JX.76, 1.JE.50, 1.JX.50, 1.JE.57, 1.JX.57, 1.JW.57, 1.JW.76, 1.JW.50 |
| Ischemic Stroke               | 434                                     | I63                                                                                                                                                                               |
| TIA                           | 435                                     | G45                                                                                                                                                                               |
| Intracranial Hemorrhage       | 430, 431, 432.x (x = 0, 1, 9)           | I60, I61.x, I62.x (x = 0, 1, 9)                                                                                                                                                   |
| Systemic Embolism             | 444                                     | I74                                                                                                                                                                               |
| Heart Failure                 | 428                                     | I50                                                                                                                                                                               |
| Hypertension                  | 401-405                                 | I10-I15                                                                                                                                                                           |
| Diabetes                      | 250                                     | E10-E13                                                                                                                                                                           |
| Chronic pulmonary disease     | 490 - 496, 500-505, 506.4, 508.1, 508.8 | I27.8, I27.9, J40-J47, J60-J67, J68.4, J70.1, J70.3                                                                                                                               |
| Cancer                        | 140-209, 230-234                        | C00 –C26, C30-41, C43-C58, C60 – C80, C81-96, D00-09                                                                                                                              |
| Dementia                      | 290, 294.1, 294.2, 331.xx               | F01, F02, F03, G30, G31                                                                                                                                                           |
| Peptic ulcer disease          | 530.2, 531, 532, 533, 534               | K22.1, K25, K26, K27, K28                                                                                                                                                         |
| Chronic Kidney Disease        | 583, 584, 585, 586, 592, 593.9          | N00-N23                                                                                                                                                                           |
| Abnormal liver function tests | 570-573, 574.x1                         | K70-K77                                                                                                                                                                           |
